# Supplementary material for: Human MIKO-1, a Hybrid Protein That Regulates Macrophage Function, Suppresses Lung Fibrosis in a Mouse Model of Bleomycin-Induced Interstitial Lung Disease
Source: MDPI journal article supplement (doi:10.3390/ijms23179669), 2022-08-26
Supplement: s1 [file s1]

**Table S1.** Primers used in the qPCR analyses in vitro.

| Gene  | Forward (5' to 3')      | Reverse (5' to 3')          |
|-------|-------------------------|-----------------------------|
| CD64  | CTTCTCCTTCTATGTGGGCAGT  | GCTACCTCGCACCCAGTATGAT      |
| CD163 | TCACTCCTGGGCTGCACGTAAAC | GATGTTATTTGCCATACAGGAGAATTG |
| IL-12 | AAGATGAAGGAGACAGAG      | CATTGGACTTCGGTAGAT          |
| IL-10 | GTGGAGCAGGTGAAGAGTGA    | TTCATGGCCTTGTAGACACCT       |
| GAPDH | ACAATGAATACGGCTACAG     | GGTCCAGGGTTTCTTACT          |

**Table S2.** Primers used in the qPCR analyses in vivo.

| Gene          | Forward (5' to 3')        | Reverse (5' to 3')      |
|---------------|---------------------------|-------------------------|
| TNF- $\alpha$ | ACCTTGTTGCCTCCTCTT        | GTTCACTGATGTAGCGACAG    |
| IL-6          | AAATGAGAAAAGAGTTGTG       | TTTGTATCTCTGGAAGTTT     |
| IL-1 $\beta$  | GATACCACTCCCAACAGA        | GCCATTGCACAACCTCTTT     |
| F4/80         | TGTCTGAAGATTCTCAAAACATGGA | TGGAGCTTCATAGTTGTAAGGCA |
| MMP-9         | CGATTCCAAACCTTCAAA        | GCAAGTCTTCAGAGTAGT      |
| TIMP-1        | AAGATGACTAAGATGCTAA       | GATGAGAAACTCTTCACT      |
| GAPDH         | ACAATGAATACGGCTACAG       | GGTCCAGGGTTTCTTACT      |
