# Supplementary material for: Human MIKO-1, a Hybrid Protein That Regulates Macrophage Function, Suppresses Lung Fibrosis in a Mouse Model of Bleomycin-Induced Interstitial Lung Disease
Source: MDPI journal article supplement (doi:10.3390/ijms23179669), 2022-08-26
Supplement: s1 [file s1]

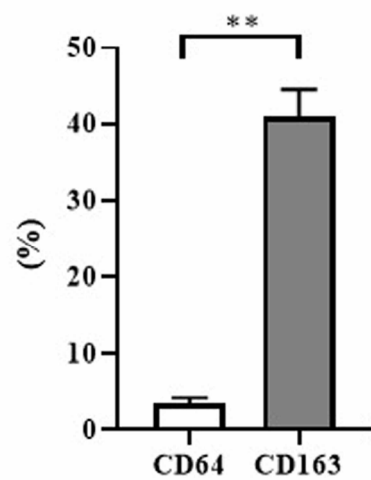

**Figure S1.** Cell surface antigens of thioglycolate-induced murine peritoneal macrophages. Expression of CD64 and CD163. Data are shown as mean  $\pm$  SD (N = 6). \*\*  $p < 0.01$ , significant difference between the linked groups.
